# Supplementary material
Source: Research Square preprint supplement (doi:10.21203/rs.3.rs-8999141/v1)
Supplement: Supplementary file 1 [file 07dece22fec8e347e47c320b.xlsx]

## Sheet: Sheet1
Genome-wide identification and characterization of the late embryogenesis abundant (LEA) protein-encoding gene family related to water deficit response in Theobroma cacao Velasco-Anacona Ginna Patricia 1,2*, Giraldo-Murcia Julian Alejandro1,3, Noriega-Ortega Jhon Eduar¹, Rojas-Cruz Alexis Felipe4 ¹Laboratorio de Ciencias Básicas, Servicio Nacional de Aprendizaje SENA, Centro de Formación Agroindu…
Online Resource 5 Genomic annotation and sequence characteristics of LEA superfamily genes
AGI Code	Group	Subfamily	NCBI GeneID	Symbol	Description	Nomenclature	Transcripts	Exon count	Chromosome	Size (bp)	Annotation Accession	Genomic start	Genomic end	Orientation	Proteins	Accession	Max Score	Total Score	Query Cover	E-value	Per. ident	Acc. Len
AT2G35300	LEA	1	18606060*	LOC18606060	uncharacterized LOC18606060	LEA-1_chr3-1	2	2	Chr3	36364294	NC_030852.1	31483181	31483953	Minus	2	XP_007039530.2, XP_017972709.1	70.5	70.5	0.69	5e-17	0.5821	127
AT5G06760	LEA	1	18599099	LOC18599099	18 kDa seed maturation protein	LEA-1_chr5-1	1	2	Chr5	39371879	NC_030854.1	28544724	28545989	Minus	1	XP_007028983.2	143	143	0.99	3e-44	0.5305	163
AT5G06761	LEA	1	18599100	LOC18599100	late embryogenesis abundant protein D-113	LEA-1_chr5-2	1	2	Chr5	39371879	NC_030854.1	28548466	28550547	Minus	1	XP_007028984.2	117	117	0.36	7e-34	66.77%	166
AT2G46300	LEA	2	18614030	LOC18614030	protein YLS9	LEA-2_chr1-1	1	3	Chr1	37323695	NC_030850.1	33969340	33971585	Plus	1	XP_017969819.1	234	234	0.98	2e-77	0.5161	248
AT2G46140	LEA	2	18614068	LOC18614068	late embryogenesis abundant protein Lea14-A	LEA-2_chr1-2	1	2	Chr1	37323695	NC_030850.1	34161976	34163125	Minus	1	XP_017974219.1	217	217	0.9	2e-73	0.6821	151
AT2G01080	LEA	2	18607375**	LOC18607375	uncharacterized LOC18607375	LEA-2_chr2-1	2	3	Chr2	41236440	NC_030851.1	2172579	2175813	Minus	2	XP_007041580.2, XP_007041581.2	265	265	0.95	9e-90	0.7619	258
AT4G23930	LEA	2	18606720**	LOC18606720	uncharacterized LOC18606720	LEA-2_chr3-1	2	2	Chr3	36364294	NC_030852.1	35117281	35118884	Minus	2	XP_017972180.1, XP_017972181.1	200	200	0.15	8e-59	0.5341	212
AT3G05975	LEA	2	18602400	LOC18602400	uncharacterized protein LOC18602400	LEA-2_chr4-1	4	2	Chr4	31929104	NC_030853.1	24143530	24147739	Plus	4	XP_007033816.2	215	215	0.86	9e-71	0.5139	215
AT2G44060	LEA	2	18597391*	LOC18597391	desiccation-related protein At2g46140	LEA-2_chr5-1	3	3	Chr5	39371879	NC_030854.1	10447	13604	Minus	3	XP_007026466.1, XP_007026467.1, XP_017976865.1	459	459	0.9	3e-164	0.7593	311
AT5G06330	LEA	2	18598383	LOC18598383	NDR1/HIN1-like protein 12	LEA-2_chr5-2	1	1	Chr5	39371879	NC_030854.1	8532798	8533973	Minus	1	XP_017977655.1	242	242	1	5e-82	0.5924	209
AT1G54540	LEA	2	18599351	LOC18599351	Late embryogenesis abundant (LEA) hydroxyproline-rich glycoprotein family	LEA-2_chr5-3	1	1	Chr5	39371879	NC_030854.1	30462818	30463845	Plus	1	XP_007029347.2	279	279	1	2e-95	0.5605	248
AT1G61760	LEA	2	18597085	LOC18597085	protein YLS9	LEA-2_chr6-1	1	1	Chr6	26303135	NC_030855.1	25016360	25017338	Minus	1	XP_017978440.1	264	264	0.91	4e-90	0.5534	230
AT1G52330	LEA	2	18588615**	LOC18588615	Late embryogenesis abundant (LEA) hydroxyproline-rich glycoprotein family	LEA-2_chr9-1	3	3	Chr9	38630433	NC_030858.1	5906866	5910232	Minus	3	XP_017978081.1, XP_017978082.1, XP_007024133.1	175	175	0.65	1e-54	0.5436	249
AT3G44380	LEA	2	18590297	LOC18590297	uncharacterized LOC18590297	LEA-2_chr9-2	1	1	Chr9	38630433	NC_030858.1	33961964	33962725	Plus	1	XP_007015786.1	277	277	0.96	1e-96	0.7611	183
AT5G21130	LEA	2	18590846**	LOC18590846	NDR1/HIN1-Like protein 3	LEA-2_chr9-3	2	3	Chr9	38630433	NC_030858.1	37191841	37194541	Minus	2	XP_007016677.1, XP_017983971.1	275	275	1	3e-93	0.5192	260
AT1G02820	LEA	3	18613581*	LOC18613581	Indole-3-acetic acid-induced protein ARG2	LEA-3_chr1-1	1	2	Chr1	37323695	NC_030850.1	31337158	31338048	Plus	1	XP_007050958.2	100	100	0.48	1e-27	0.5895	94
AT4G15910	LEA	3	18596305**	LOC18596305	protein SENESCENCE-ASSOCIATED GENE 21, mitochondrial	LEA-3_chr6-1	2	2	Chr6	26303135	NC_030855.1	20603242	20603979	Plus	2	XP_007024758.2, XP_017979280.1	172	172	1	3e-58	57.65%	85
AT5G44310	LEA	4	108661872*	LOC108661872	embryonic protein DC-8-like	LEA-4_chr5-1	1	2	Chr5	39371879	NC_030854.1	4189865	4191456	Plus	1	XP_017976228.1	342	447	0.82	4e-115	76.05%	438
AT3G51810	LEA	5	18597510*	LOC18597510	protein SLE1	LEA-5_chr5-1	1	3	Chr5	39371879	NC_030854.1	561924	563901	Plus	1	XP_007026648.2	147	147	0.98	5e-46	0.5839	174
AT3G51810	LEA	5	18585833	LOC18585833	em-like protein GEA6	LEA-5_chr10-1	1	3	Chr10	21822658	NC_030859.1	685109	685942	Plus	1	XP_007008931.2	85.1	149	0.72	1e-21	0.6769	156
AT3G51810	LEA	5	18585834	LOC18585834	em-like protein	LEA-5_chr10-2	1	2	Chr10	21822658	NC_030859.1	687302	688033	Plus	1	XP_007008932.1	85.1	158	0.82	2e-22	0.5802	99
AT2G33690	LEA	6	18607153*	LOC18607153	uncharacterized LOC18607153	LEA-6_chr2-1	1	1	Chr2	41236440	NC_030851.1	1044203	1044583	Plus	1	XP_007041238.2	63.9	63.9	0.78	3e-15	0.55	89
AT1G03120	SMP		18613320*	LOC18613320	Late embryogenesis abundant protein D-34	SMP_chr1-1	1	4	Chr1	37323695	NC_030850.1	29482148	29483586	Plus	1	XP_007050564.2	127	127	0.74	2,00E-36	52,55%	284
AT3G22500	SMP		18602997	LOC18602997	late embryogenesis abundant protein D-34	SMP_chr4-1	1	3	Chr4	31929104	NC_030853.1	27963963	27966158	Minus	1	XP_017974681.1	203	203	1	2e-65	0.5208	237
AT3G22500	SMP		18600259	LOC18600259	late embryogenesis abundant protein D-34	SMP_chr5-1	1	3	Chr5	39371879	NC_030854.1	37203759	37205712	Plus	1	XP_007030655.2	197	197	0.98	1e-62	0.5312	256
AT3G50980	DHN		18610856	LOC18610856	late embryogenesis abundant protein D-11	DHD_chr1-1	1	2	Chr1	37323695	NC_030850.1	1240352	1241118	Minus	1	XP_017983363.1	176	176	0.46	1e-57	78.84%	114
AT3G50980	DHN		18607463	LOC18607463	phosphoprotein ECPP44	DHD_chr2-1	1	2	Chr2	41236440	NC_030851.1	2564426	2565626	Plus	1	XP_017970635.1	34.3	34.3	0.24	8e-22	0.5143	173
AT3G50980	DHN		18607734	LOC18607734	late embryogenesis abundant protein	DHD_chr2-2	1	2	Chr2	41236440	NC_030851.1	3961359	3962803	Minus	1	XP_007042106.2	53.1	53.1	0.6	1e-15	0.5	169
AT1G54410	DHN		18599816	LOC18599816	Protein SRC1	DHD_chr5-1	1	2	Chr5	39371879	NC_030854.1	34354828	34355623	Plus	1	XP_007030020.1	42,7	42,7	0.57	1e-22	50,77%	98
AT1G76180	DHN		18591660*	LOC18591660	Dehydrin COR 47	DHD_chr8-1	1	2	Chr8	19593398	NC_030857.1	2487207	2488654	Minus	1	XP_007017965.2	50,4	50,4	0.3	8e-20	0.5	234
* Genes selected for validation by qPCR.
** Genes present isoforms.
