# Supplementary material
Source: Research Square preprint supplement (doi:10.21203/rs.3.rs-8999141/v1)
Supplement: Supplementary file 2 [file 3a606d1b470b34cc15bcd7a2.xlsx]

## Sheet: Tc_Gh
Genome-wide identification and characterization of the late embryogenesis abundant (LEA) protein-encoding gene family related to water deficit response in Theobroma cacao Velasco-Anacona Ginna Patricia¹*, Giraldo-Murcia Julian Alejandro¹, Noriega-Ortega Jhon Eduar¹, Rojas-Cruz Alexis Felipe2 ¹Laboratorio de Biología Molecular, Servicio Nacional de Aprendizaje, Centro de Formación Agroindustrial, …
Online Resource 7.1 Orthologous relationships of LEA superfamily genes between Theobroma cacao (Tc) and Gossypium hirsutum (Gh)
Tc Chromosome	Tc Nomenclature	Tc Transcript	Gh Chromosome	Gh Transcript
Tc_chr1	SMP_chr1-1	XM_007050502.2	Gh_chrA02	rna-XM_016876377.2
Tc_chr1	LEA-2_chr1-2	XM_018118730.1	Gh_chrA07	rna-XM_016891005.2
Tc_chr1	SMP_chr1-1	XM_007050502.2	Gh_chrA08	rna-XM_016889167.2
Tc_chr1	LEA-3_chr1-1	XM_007050896.2	Gh_chrA08	rna-XM_016857779.2
Tc_chr1	LEA-2_chr1-1	XM_018114330.1	Gh_chrA08	rna-XM_041074635.1
Tc_chr1	LEA-2_chr1-2	XM_018118730.1	Gh_chrA08	rna-XM_041074645.1
Tc_chr1	DHD_chr1-1	XM_018127874.1	Gh_chrA11	rna-XM_016821879.2
Tc_chr1	LEA-2_chr1-1	XM_018114330.1	Gh_chrA11	rna-XM_016837423.2
Tc_chr1	LEA-2_chr1-2	XM_018118730.1	Gh_chrA11	rna-NM_001426008.1
Tc_chr1	SMP_chr1-1	XM_007050502.2	Gh_chrD02	rna-XM_016858752.2
Tc_chr1	LEA-2_chr1-2	XM_018118730.1	Gh_chrD07	rna-XM_016890101.2
Tc_chr1	SMP_chr1-1	XM_007050502.2	Gh_chrD08	rna-XM_016835436.2
Tc_chr1	LEA-3_chr1-1	XM_007050896.2	Gh_chrD08	rna-XM_016842404.2
Tc_chr1	LEA-3_chr1-1	XM_007050896.2	Gh_chrD08	rna-XM_016847735.2
Tc_chr1	LEA-2_chr1-1	XM_018114330.1	Gh_chrD08	rna-XM_016826727.2
Tc_chr1	DHD_chr1-1	XM_018127874.1	Gh_chrD11	rna-XM_016841483.2
Tc_chr1	SMP_chr1-1	XM_007050502.2	Gh_chrD11	rna-XM_041106083.1
Tc_chr1	LEA-2_chr1-1	XM_018114330.1	Gh_chrD11	rna-XM_016855433.2
Tc_chr1	LEA-2_chr1-2	XM_018118730.1	Gh_chrD11	rna-XM_041105908.1
Tc_chr1	LEA-2_chr1-1	XM_018114330.1	Gh_chrD12	rna-XM_041107996.1
Tc_chr2	LEA-2_chr2-1	XM_007041518.2	Gh_chrA01	rna-XM_016872520.2
Tc_chr2	DHD_chr2-2	XM_007042044.2	Gh_chrA03	rna-XM_016859036.2
Tc_chr2	DHD_chr2-2	XM_007042044.2	Gh_chrA04	rna-XM_016883811.2
Tc_chr2	DHD_chr2-1	XM_018115146.1	Gh_chrA12	rna-XM_016864243.2
Tc_chr2	DHD_chr2-2	XM_007042044.2	Gh_chrA12	rna-XM_016872460.2
Tc_chr2	LEA-2_chr2-1	XM_007041518.2	Gh_chrD01	rna-XM_016860163.2
Tc_chr2	DHD_chr2-2	XM_007042044.2	Gh_chrD04	rna-XM_016824077.2
Tc_chr2	DHD_chr2-2	XM_007042044.2	Gh_chrD12	rna-XM_016878829.2
Tc_chr2	DHD_chr2-1	XM_018115146.1	Gh_chrD12	rna-XM_016878939.2
Tc_chr3	LEA-2_chr3-1	XM_018116691.1	Gh_chrA02	rna-XM_016886118.2
Tc_chr3	LEA-1_chr3-1	XM_007039468.2	Gh_chrA08	rna-XM_016850175.2
Tc_chr3	LEA-2_chr3-1	XM_018116691.1	Gh_chrA12	rna-XM_041083592.1
Tc_chr3	LEA-2_chr3-1	XM_018116691.1	Gh_chrD03	rna-XM_041089992.1
Tc_chr3	LEA-1_chr3-1	XM_007039468.2	Gh_chrD08	rna-XM_016865839.2
Tc_chr3	LEA-2_chr3-1	XM_018116691.1	Gh_chrD12	rna-XM_016881694.2
Tc_chr4	SMP_chr4-1	XM_018119192.1	Gh_chrA02	rna-XM_016876377.2
Tc_chr4	LEA-2_chr4-1	XM_018119985.1	Gh_chrA02	rna-XM_016886374.2
Tc_chr4	SMP_chr4-1	XM_018119192.1	Gh_chrD02	rna-XM_016858752.2
Tc_chr4	LEA-2_chr4-1	XM_018119985.1	Gh_chrD02	rna-XM_016835377.2
Tc_chr4	SMP_chr4-1	XM_018119192.1	Gh_chrD08	rna-XM_041099813.1
Tc_chr5	LEA-2_chr5-2	XM_018122166.1	Gh_chrA01	rna-XM_016856385.2
Tc_chr5	LEA-2_chr5-1	XM_007026404.2	Gh_chrA01	rna-XM_016873046.2
Tc_chr5	LEA-1_chr5-2	XM_007028922.2	Gh_chrA01	rna-XM_041113933.1
Tc_chr5	LEA-2_chr5-3	XM_007029285.2	Gh_chrA05	rna-XM_016897558.2
Tc_chr5	LEA-1_chr5-2	XM_007028922.2	Gh_chrA09	rna-XM_016813952.2
Tc_chr5	LEA-5_chr5-1	XM_007026586.2	Gh_chrA09	rna-XM_016869857.2
Tc_chr5	SMP_chr5-1	XM_007030593.2	Gh_chrA13	rna-XM_016825125.2
Tc_chr5	LEA-1_chr5-1	XM_007028921.2	Gh_chrD01	rna-XM_016851211.2
Tc_chr5	LEA-2_chr5-2	XM_018122166.1	Gh_chrD01	rna-XM_016859396.2
Tc_chr5	LEA-2_chr5-1	XM_007026404.2	Gh_chrD01	rna-XM_041087781.1
Tc_chr5	LEA-2_chr5-3	XM_007029285.2	Gh_chrD04	rna-XM_016897538.2
Tc_chr5	LEA-2_chr5-2	XM_018122166.1	Gh_chrD04	rna-XM_016825131.2
Tc_chr5	LEA-1_chr5-1	XM_007028921.2	Gh_chrD09	rna-XM_016815989.2
Tc_chr5	LEA-2_chr5-2	XM_018122166.1	Gh_chrD09	rna-XM_016815883.2
Tc_chr5	LEA-5_chr5-1	XM_007026586.2	Gh_chrD09	rna-XM_016815556.2
Tc_chr5	SMP_chr5-1	XM_007030593.2	Gh_chrD13	rna-XM_041109733.1
Tc_chr6	LEA-2_chr6-1	XM_018122951.1	Gh_chrA10	rna-XM_016855689.2
Tc_chr6	LEA-2_chr6-1	XM_018122951.1	Gh_chrD06	rna-XM_016826023.2
Tc_chr6	LEA-2_chr6-1	XM_018122951.1	Gh_chrD06	rna-XM_016896469.2
Tc_chr6	LEA-3_chr6-1	XM_007024696.2	Gh_chrD06	rna-XM_041095525.1
Tc_chr8	DHD_chr8-1	XM_007017903.2	Gh_chrA01	rna-XM_016847434.2
Tc_chr8	DHD_chr8-1	XM_007017903.2	Gh_chrA05	rna-XM_016870467.2
Tc_chr8	DHD_chr8-1	XM_007017903.2	Gh_chrD01	rna-XM_016852491.2
Tc_chr8	DHD_chr8-1	XM_007017903.2	Gh_chrD05	rna-XM_016832365.2
Tc_chr9	LEA-2_chr9-3	XM_018128482.1	Gh_chrA03	rna-XM_041107053.1
Tc_chr9	LEA-2_chr9-3	XM_018128482.1	Gh_chrA05	rna-XM_016895010.2
Tc_chr9	LEA-2_chr9-1	XM_018128185.1	Gh_chrA06	rna-XM_016899136.2
Tc_chr9	LEA-2_chr9-1	XM_018128185.1	Gh_chrA07	rna-XM_016862498.2
Tc_chr9	LEA-2_chr9-2	XM_007015724.2	Gh_chrA07	rna-XM_016888495.2
Tc_chr9	LEA-2_chr9-2	XM_007015724.2	Gh_chrA08	rna-XM_016883746.2
Tc_chr9	LEA-2_chr9-3	XM_018128482.1	Gh_chrD03	rna-XM_041090358.1
Tc_chr9	LEA-2_chr9-3	XM_018128482.1	Gh_chrD05	rna-XM_016833128.2
Tc_chr9	LEA-2_chr9-1	XM_018128185.1	Gh_chrD06	rna-XM_016827132.2
Tc_chr9	LEA-2_chr9-1	XM_018128185.1	Gh_chrD07	rna-XM_016865063.2
Tc_chr9	LEA-2_chr9-2	XM_007015724.2	Gh_chrD07	rna-XM_016889602.2
Tc_chr9	LEA-2_chr9-2	XM_007015724.2	Gh_chrD08	rna-XM_016864404.2
Tc_chr10	LEA-5_chr10-1	XM_007008869.2	Gh_chrA06	rna-XM_016882792.2
Tc_chr10	LEA-4_chr6-1	XM_007008870.2	Gh_chrA10	rna-XM_016869044.2
Tc_chr10	LEA-5_chr10-1	XM_007008869.2	Gh_chrD06	rna-XM_016826151.2
Tc_chr10	LEA-5_chr10-1	XM_007008869.2	Gh_chrD10	rna-XM_016863699.2

## Sheet: Tc_Sl
Genome-wide identification and characterization of the late embryogenesis abundant (LEA) protein-encoding gene family related to water deficit response in Theobroma cacao Velasco-Anacona Ginna Patricia¹*, Giraldo-Murcia Julian Alejandro¹, Noriega-Ortega Jhon Eduar¹, Rojas-Cruz Alexis Felipe2 ¹Laboratorio de Biología Molecular, Servicio Nacional de Aprendizaje, Centro de Formación Agroindustrial, …
Online Resource 7.2 Orthologous relationships of LEA superfamily genes between Theobroma cacao (Tc) and Solanum lycopersicum (Sl)
Tc Chromosome	Tc Nomenclature	Tc Transcript	Sl Chromosome	Sl Transcript
Tc_chr1	LEA-2_chr1-2	XM_018118730.1	Sl_chr1	rna-NM_001247009.2
Tc_chr1	DHD_chr1-1	XM_018127874.1	Sl_chr2	rna-XM_004232388.4
Tc_chr1	LEA-3_chr1-1	XM_007050896.2	Sl_chr6	rna-XM_004240499.4
Tc_chr1	LEA-3_chr1-1	XM_007050896.2	Sl_chr9	rna-NM_001346944.1
Tc_chr1	SMP_chr1-1	XM_007050502.2	Sl_chr9	rna-XM_019215796.2
Tc_chr1	SMP_chr1-1	XM_007050502.2	Sl_chr9	rna-XM_004247615.3
Tc_chr1	LEA-2_chr1-1	XM_018114330.1	Sl_chr10	rna-XM_004248023.4
Tc_chr1	LEA-2_chr1-2	XM_018118730.1	Sl_chr10	rna-XM_004248016.4
Tc_chr2	LEA-2_chr2-1	XM_007041518.2	Sl_chr1	rna-XM_004230586.4
Tc_chr2	DHD_chr2-2	XM_007042044.2	Sl_chr1	rna-XM_004230885.4
Tc_chr2	DHD_chr2-1	XM_018115146.1	Sl_chr4	rna-NM_001329436.1
Tc_chr3	LEA-2_chr3-1	XM_018116691.1	Sl_chr1	rna-XM_004229938.4
Tc_chr3	LEA-1_chr3-1	XM_007039468.2	Sl_chr6	rna-XM_004241921.4
Tc_chr3	LEA-2_chr3-1	XM_018116691.1	Sl_chr8	rna-XM_004245460.4
Tc_chr4	SMP_chr4-1	XM_018119192.1	Sl_chr1	rna-XM_004230083.3
Tc_chr4	SMP_chr4-1	XM_018119192.1	Sl_chr9	rna-XM_004247615.3
Tc_chr4	SMP_chr4-1	XM_018119192.1	Sl_chr9	rna-XM_019215796.2
Tc_chr5	SMP_chr5-1	XM_007030593.2	Sl_chr1	rna-XM_004230083.3
Tc_chr5	LEA-2_chr5-2	XM_018122166.1	Sl_chr6	rna-XM_004241293.4
Tc_chr5	LEA-2_chr5-1	XM_007026404.2	Sl_chr8	rna-XM_004244735.4
Tc_chr5	LEA-4_chr5-1	XM_018120739.1	Sl_chr9	rna-XM_004246855.4
Tc_chr5	LEA-1_chr5-1	XM_007028921.2	Sl_chr10	rna-XM_019216136.2
Tc_chr5	LEA-2_chr5-2	XM_018122166.1	Sl_chr11	rna-XM_004251045.3
Tc_chr6	LEA-2_chr6-1	XM_018122951.1	Sl_chr3	rna-XM_019212817.2
Tc_chr8	DHD_chr8-1	XM_007017903.2	Sl_chr4	rna-NM_001329436.1
Tc_chr9	LEA-2_chr9-2	XM_007015724.2	Sl_chr11	rna-XM_004251019.4

## Sheet: Tc_At
Genome-wide identification and characterization of the late embryogenesis abundant (LEA) protein-encoding gene family related to water deficit response in Theobroma cacao Velasco-Anacona Ginna Patricia1,2*, Giraldo-Murcia Julian Alejandro1,3, Noriega-Ortega Jhon Eduar¹, Rojas-Cruz Alexis Felipe4 ¹Laboratorio de Ciencias Básicas, Servicio Nacional de Aprendizaje SENA, Centro de Formación Agroindus…
Online Resource 7.3 Orthologous relationships of LEA superfamily genes between Theobroma cacao (Tc) and Arabidopsis thaliana (At).
Tc Chromosome	Tc Nomenclature	Tc Transcript	At Chromosome	At Transcript
Tc_chr1	LEA-2_chr1-1	XM_018114330.1	At_chr1	rna-NM_001123736.1
Tc_chr1	LEA-2_chr1-2	XM_018118730.1	At_chr1	rna-NM_100029.6
Tc_chr1	SMP_chr1-1	XM_007050502.2	At_chr1	rna-NM_100194.2
Tc_chr1	LEA-3_chr1-1	XM_007050896.2	At_chr1	rna-NM_100163.3
Tc_chr1	LEA-2_chr1-2	XM_018118730.1	At_chr2	rna-NM_130176.3
Tc_chr1	LEA-2_chr1-1	XM_018114330.1	At_chr2	rna-NM_130193.3
Tc_chr1	SMP_chr1-1	XM_007050502.2	At_chr3	rna-NM_113148.1
Tc_chr1	LEA-2_chr1-1	XM_018114330.1	At_chr4	rna-NM_116341.4
Tc_chr1	LEA-3_chr1-1	XM_007050896.2	At_chr4	rna-NM_117683.5
Tc_chr1	LEA-3_chr1-1	XM_007050896.2	At_chr4	rna-NM_001340372.1
Tc_chr2	DHD_chr2-2	XM_007042044.2	At_chr2	rna-NM_127721.4
Tc_chr2	DHD_chr2-2	XM_007042044.2	At_chr4	rna-NM_120073.2
Tc_chr3	LEA-2_chr3-1	XM_018116691.1	At_chr1	rna-NM_105120.4
Tc_chr3	LEA-1_chr3-1	XM_007039468.2	At_chr1	rna-NM_102991.4
Tc_chr3	LEA-1_chr3-1	XM_007039468.2	At_chr2	rna-NM_129082.4
Tc_chr3	LEA-2_chr3-1	XM_018116691.1	At_chr4	rna-NM_118525.3
Tc_chr4	SMP_chr4-1	XM_018119192.1	At_chr3	rna-NM_113148.1
Tc_chr5	LEA-2_chr5-2	XM_018122166.1	At_chr2	rna-NM_129155.5
Tc_chr5	LEA-2_chr5-1	XM_007026404.2	At_chr2	rna-NM_129968.4
Tc_chr5	LEA-5_chr5-1	XM_007026586.2	At_chr2	rna-NM_129575.3
Tc_chr5	LEA-2_chr5-2	XM_018122166.1	At_chr3	rna-NM_111998.3
Tc_chr5	LEA-5_chr5-1	XM_007026586.2	At_chr3	rna-NM_115040.3
Tc_chr5	LEA-4_chr5-1	XM_018120739.1	At_chr3	rna-NM_115164.3
Tc_chr5	LEA-2_chr5-2	XM_018122166.1	At_chr3	rna-NM_115107.4
Tc_chr5	SMP_chr5-1	XM_007030593.2	At_chr3	rna-NM_113148.1
Tc_chr5	LEA-1_chr5-1	XM_007028921.2	At_chr5	rna-NM_120759.3
Tc_chr5	SMP_chr5-1	XM_007030593.2	At_chr5	rna-NM_122681.4
Tc_chr8	DHD_chr8-1	XM_007017903.2	At_chr1	rna-NM_101894.4
Tc_chr9	LEA-2_chr9-1	XM_018128185.1	At_chr1	rna-NM_001084235.1
Tc_chr9	LEA-2_chr9-3	XM_018128482.1	At_chr2	rna-NM_201811.1
Tc_chr9	LEA-2_chr9-2	XM_007015724.2	At_chr3	rna-NM_114306.3
Tc_chr9	LEA-2_chr9-1	XM_018128185.1	At_chr4	rna-NM_117400.3
Tc_chr9	LEA-2_chr9-3	XM_018128482.1	At_chr5	rna-NM_122121.3
Tc_chr10	LEA-5_chr10-1	XM_007008869.2	At_chr2	rna-NM_129575.3
