# Supplementary material
Source: Research Square preprint supplement (doi:10.21203/rs.3.rs-8999141/v1)
Supplement: Supplementary file 3 [file 3df940860eb58eee8f0de95d.xlsx]

## Sheet: Online Resource 9
"Genome-wide identification and characterization of the late embryogenesis abundant (LEA) protein-encoding gene family related to water deficit response in Theobroma cacao Velasco-Anacona Ginna Patricia 1,2*, Giraldo-Murcia Julian Alejandro1,3, Noriega-Ortega Jhon Eduar¹, Rojas-Cruz Alexis Felipe4 ¹Laboratorio de Ciencias Básicas, Servicio Nacional de Aprendizaje SENA, Centro de Formación Agroind…
Online Resource 9 Relative expression levels (2⁻ΔΔCt) of LEA genes across clones and sampling time points.
Clone	DAT	LEA-1	LEA-2	LEA-3	LEA-4	LEA-5	LEA-6	SMP	DHN
EET 8	DAT19	1.75	1.32	4.69	1.27	2.97	3.21	4.56	-8.15
EET 8	DAT19	1.66	1.31	4.94	1.24	2.8	3.06	4.12	-7.87
EET 8	DAT19	1.69	1.35	4.74	1.34	2.54	3.07	3.93	-6.98
EET 8	DAT19	1.63	1.31	4.58	1.29	2.45	2.97	3.79	-7.23
EET 8	DAT30	-1.12	-1.22	5.84	2.49	8.16	-1.1	3.56	-3.02
EET 8	DAT30	-1.15	-1.31	5.74	1.76	7.38	-1.11	3.68	-3.31
EET 8	DAT30	-1.13	-1.26	5.52	1.9	6.68	-1.11	3.51	-2.94
EET 8	DAT30	-1.18	-1.27	5.22	2.5	6.87	-1.13	3.38	-2.89
TSH 565	DAT19	1.37	-1.27	22.12	1.97	6.63	3.28	7.12	3.48
TSH 565	DAT19	6.32	-1.66	20.27	1.99	7.75	3.13	19.11	5.6
TSH 565	DAT19	10.83	-1.02	32.82	3.22	12.55	5.06	30.93	9.06
TSH 565	DAT19	12.61	1.14	38.22	3.75	14.61	5.9	36.02	10.55
TSH 565	DAT30	-33.07	-5.37	1.47	-9.66	7.31	-2.57	-8.61	-10.49
TSH 565	DAT30	-45.57	-21.19	1.46	-4.2	3.86	2.16	-12.13	-14.79
TSH 565	DAT30	-28.87	-12.79	2.42	-2.53	6.4	3.57	-7.32	-8.93
TSH 565	DAT30	-24.8	-11.11	2.79	-2.2	7.37	4.11	-6.36	-7.75
ICS 60	DAT19	18.14	3.33	39.76	-2.66	7.21	-1.3	1.9	10.38
ICS 60	DAT19	25.29	3.97	42.35	-2.24	14.65	-1.33	2.55	15.58
ICS 60	DAT19	15.24	3.66	48.53	-2.21	5.55	1.23	1.81	8.4
ICS 60	DAT19	13.89	2.39	28.42	-3.55	5.65	-1.66	1.35	7.17
ICS 60	DAT30	-14.47	4.98	7.01	2.7	3.58	-9.8	4.39	-14.63
ICS 60	DAT30	-9.74	2.09	1.91	-1.66	4.65	-10.44	3.33	-11.08
ICS 60	DAT30	-16.15	1.98	2.24	-1.61	1.8	-6.24	2.42	-20.08
ICS 60	DAT30	-17.52	1.29	1.31	-2.58	1.84	-12.73	1.8	-23.51
