# Supplementary material
Source: Research Square preprint supplement (doi:10.21203/rs.3.rs-8999141/v1)
Supplement: Supplementary file 4 [file 422968c4cefbaf6d1fe642d8.xlsx]

## Sheet: Sheet1
Genome-wide identification and characterization of the late embryogenesis abundant (LEA) protein-encoding gene family related to water deficit response in Theobroma cacao Velasco-Anacona Ginna Patricia 1,2*, Giraldo-Murcia Julian Alejandro1,3, Noriega-Ortega Jhon Eduar¹, Rojas-Cruz Alexis Felipe4 ¹Laboratorio de Ciencias Básicas, Servicio Nacional de Aprendizaje SENA, Centro de Formación Agroindu…
Online Resource 2 Primers used for qPCR
Description	Forward Primer	Reverse Primer
LEA-1*	CGCGAAGGAGAGATTGAGGT	CTGCACTTCCGACAGTCTGT
LEA-1	GCACGCGAAGGAGAGATTGA	CCATGAGTGCCTGAGACTGG
LEA-2	ACCTCATCGAGAGTGACGGA	GACAGTCTCCTGGCCATGAG
LEA-2*	TTCCAGATGCCGGAACCATC	GGGAATGATGCTTCCAGGCT
LEA-3*	ACAAGGAGTTGTGTCCGGTG	CCGGTAACTGGGTCAGGAAC
LEA-3	GGTTTCTTCTTCGCTGCTGC	CGCTACTGCAGAGAGCCTTT
LEA-4	ACAAAGGACACCGTAGCTGG	GCCTTTCCCGTTGTTGTGTC
LEA-4*	AGCGGAGGAGTTAGCTCAGA	CCTTCTGTGCGGACTCCTTT
LEA-5	TTACATCCCACCACCAGCAC	GACTGCCACTGCCAACTAGT
LEA-5*	AAGTCATCATGGCCTCGCAA	AAGGTGCTCTTGAGCTGCAA
LEA-6	TGGAGATAAAGCAAGGCGCA	GAGGATGGACTTAGCGTCGG
LEA-6*	GAGCAGCCCTTACGTCAAGT	TGCGCCTTGCTTTATCTCCA
SMP*	CTCCAACGCCAGTTAGAGGG	GCTGTTGCCTCCAAAGCTTC
SMP	TCGATGTCACCGGTGGATTG	CACTTGGTTCTCGGCAATGC
DHN	TCTCGTTTGCGTCCTGTTCA	CTGTGATGCTCCTCAGCCAT
DHN*	GCTGTAGAGACCAAGGACCG	CGATCACCACCTCCTCTTGG
ACPB*	GCAGACAAGATCAGCACAA	AAATCAAAGGGCACGACT
* Primers used for validation by qPCR.
