# Supplementary material
Source: Research Square preprint supplement (doi:10.21203/rs.3.rs-8999141/v1)
Supplement: Supplementary file 5 [file 5e3c2e65aa352449a9d2d90d.xlsx]

## Sheet: Sheet1
Genome-wide identification and characterization of the late embryogenesis abundant (LEA) protein-encoding gene family related to water deficit response in Theobroma cacao Velasco-Anacona Ginna Patricia 1,2*, Giraldo-Murcia Julian Alejandro1,3, Noriega-Ortega Jhon Eduar¹, Rojas-Cruz Alexis Felipe4 ¹Laboratorio de Ciencias Básicas, Servicio Nacional de Aprendizaje SENA, Centro de Formación Agroindu…
Online Resource 8 Raw RT-qPCR Ct values for target genes across clones and sampling time points
Clone	Gene	DAT	Ct
EET 8	ACPB	WW	29537
EET 8	ACPB	WW	29716
EET 8	ACPB	WW	29616
EET 8	ACPB	DAT19	30034
EET 8	ACPB	DAT19	30025
EET 8	ACPB	DAT19	29925
EET 8	ACPB	DAT30	29446
EET 8	ACPB	DAT30	29019
EET 8	ACPB	DAT30	28919
EET 8	LEA-1	WW	29261
EET 8	LEA-1	WW	29373
EET 8	LEA-1	WW	29273
EET 8	LEA-1	DAT19	29018
EET 8	LEA-1	DAT19	28845
EET 8	LEA-1	DAT19	28745
EET 8	LEA-1	DAT30	28952
EET 8	LEA-1	DAT30	29035
EET 8	LEA-1	DAT30	28935
EET 8	LEA-2	WW	30637
EET 8	LEA-2	WW	30615
EET 8	LEA-2	WW	30515
EET 8	LEA-2	DAT19	30462
EET 8	LEA-2	DAT19	30660
EET 8	LEA-2	DAT19	30560
EET 8	LEA-2	DAT30	30617
EET 8	LEA-2	DAT30	30314
EET 8	LEA-2	DAT30	30214
EET 8	LEA-3	WW	30790
EET 8	LEA-3	WW	31423
EET 8	LEA-3	WW	31323
EET 8	LEA-3	DAT19	28870
EET 8	LEA-3	DAT19	29596
EET 8	LEA-3	DAT19	29496
EET 8	LEA-3	DAT30	28080
EET 8	LEA-3	DAT30	28217
EET 8	LEA-3	DAT30	28117
EET 8	LEA-4	WW	31158
EET 8	LEA-4	WW	30761
EET 8	LEA-4	WW	30661
EET 8	LEA-4	DAT19	30885
EET 8	LEA-4	DAT19	30942
EET 8	LEA-4	DAT19	30842
EET 8	LEA-4	DAT30	30910
EET 8	LEA-4	DAT30	28169
EET 8	LEA-4	DAT30	28069
EET 8	LEA-5	WW	31482
EET 8	LEA-5	WW	32621
EET 8	LEA-5	WW	32521
EET 8	LEA-5	DAT19	31191
EET 8	LEA-5	DAT19	30970
EET 8	LEA-5	DAT19	30870
EET 8	LEA-5	DAT30	29112
EET 8	LEA-5	DAT30	28521
EET 8	LEA-5	DAT30	28421
EET 8	LEA-6	WW	30902
EET 8	LEA-6	WW	31162
EET 8	LEA-6	WW	31062
EET 8	LEA-6	DAT19	29845
EET 8	LEA-6	DAT19	29725
EET 8	LEA-6	DAT19	29625
EET 8	LEA-6	DAT30	30791
EET 8	LEA-6	DAT30	30583
EET 8	LEA-6	DAT30	30533
EET 8	SMP	WW	30942
EET 8	SMP	WW	31642
EET 8	SMP	WW	31542
EET 8	SMP	DAT19	29989
EET 8	SMP	DAT19	29393
EET 8	SMP	DAT19	29293
EET 8	SMP	DAT30	28996
EET 8	SMP	DAT30	28978
EET 8	SMP	DAT30	28953
EET 8	DHN	WW	32699
EET 8	DHN	WW	31946
EET 8	DHN	WW	31846
EET 8	DHN	DAT19	35507
EET 8	DHN	DAT19	35489
EET 8	DHN	DAT19	35464
EET 8	DHN	DAT30	33636
EET 8	DHN	DAT30	33130
EET 8	DHN	DAT30	33030
TSH 565	ACPB	WW	31109
TSH 565	ACPB	WW	30497
TSH 565	ACPB	WW	30914
TSH 565	ACPB	DAT19	33486
TSH 565	ACPB	DAT19	33461
TSH 565	ACPB	DAT19	33561
TSH 565	ACPB	DAT30	27129
TSH 565	ACPB	DAT30	26954
TSH 565	ACPB	DAT30	27004
TSH 565	LEA-1	WW	29770
TSH 565	LEA-1	WW	29732
TSH 565	LEA-1	WW	29687
TSH 565	LEA-1	DAT19	29844
TSH 565	LEA-1	DAT19	29864
TSH 565	LEA-1	DAT19	29816
TSH 565	LEA-1	DAT30	29716
TSH 565	LEA-1	DAT30	29912
TSH 565	LEA-1	DAT30	29664
TSH 565	LEA-2	WW	32507
TSH 565	LEA-2	WW	31056
TSH 565	LEA-2	WW	31781
TSH 565	LEA-2	DAT19	34474
TSH 565	LEA-2	DAT19	34799
TSH 565	LEA-2	DAT19	34749
TSH 565	LEA-2	DAT30	31328
TSH 565	LEA-2	DAT30	31603
TSH 565	LEA-2	DAT30	31465
TSH 565	LEA-3	WW	34089
TSH 565	LEA-3	WW	32920
TSH 565	LEA-3	WW	33504
TSH 565	LEA-3	DAT19	31191
TSH 565	LEA-3	DAT19	31516
TSH 565	LEA-3	DAT19	31466
TSH 565	LEA-3	DAT30	28961
TSH 565	LEA-3	DAT30	29236
TSH 565	LEA-3	DAT30	29098
TSH 565	LEA-4	WW	33552
TSH 565	LEA-4	WW	32789
TSH 565	LEA-4	WW	33170
TSH 565	LEA-4	DAT19	34241
TSH 565	LEA-4	DAT19	34566
TSH 565	LEA-4	DAT19	34516
TSH 565	LEA-4	DAT30	31177
TSH 565	LEA-4	DAT30	31452
TSH 565	LEA-4	DAT30	31315
TSH 565	LEA-5	WW	34557
TSH 565	LEA-5	WW	33760
TSH 565	LEA-5	WW	34159
TSH 565	LEA-5	DAT19	33321
TSH 565	LEA-5	DAT19	33646
TSH 565	LEA-5	DAT19	33596
TSH 565	LEA-5	DAT30	27615
TSH 565	LEA-5	DAT30	27890
TSH 565	LEA-5	DAT30	27752
TSH 565	LEA-6	WW	31667
TSH 565	LEA-6	WW	31500
TSH 565	LEA-6	WW	31584
TSH 565	LEA-6	DAT19	31982
TSH 565	LEA-6	DAT19	32307
TSH 565	LEA-6	DAT19	32257
TSH 565	LEA-6	DAT30	26729
TSH 565	LEA-6	DAT30	27004
TSH 565	LEA-6	DAT30	26867
TSH 565	SMP	WW	31668
TSH 565	SMP	WW	32183
TSH 565	SMP	WW	31926
TSH 565	SMP	DAT19	30086
TSH 565	SMP	DAT19	30411
TSH 565	SMP	DAT19	30361
TSH 565	SMP	DAT30	30010
TSH 565	SMP	DAT30	30285
TSH 565	SMP	DAT30	30148
TSH 565	DHN	WW	34892
TSH 565	DHN	WW	33719
TSH 565	DHN	WW	34306
TSH 565	DHN	DAT19	34053
TSH 565	DHN	DAT19	34378
TSH 565	DHN	DAT19	34328
TSH 565	DHN	DAT30	33186
TSH 565	DHN	DAT30	33461
TSH 565	DHN	DAT30	33323
ICS 60	ACPB	WW	30311
ICS 60	ACPB	WW	30440
ICS 60	ACPB	WW	30619
ICS 60	ACPB	DAT19	33381
ICS 60	ACPB	DAT19	33167
ICS 60	ACPB	DAT19	33267
ICS 60	ACPB	DAT30	28606
ICS 60	ACPB	DAT30	28563
ICS 60	ACPB	DAT30	28531
ICS 60	LEA-1	WW	28528
ICS 60	LEA-1	WW	28877
ICS 60	LEA-1	WW	28685
ICS 60	LEA-1	DAT19	28789
ICS 60	LEA-1	DAT19	28683
ICS 60	LEA-1	DAT19	28702
ICS 60	LEA-1	DAT30	30092
ICS 60	LEA-1	DAT30	29837
ICS 60	LEA-1	DAT30	30004
ICS 60	LEA-2	WW	30978
ICS 60	LEA-2	WW	30581
ICS 60	LEA-2	WW	30779
ICS 60	LEA-2	DAT19	32836
ICS 60	LEA-2	DAT19	33161
ICS 60	LEA-2	DAT19	33111
ICS 60	LEA-2	DAT30	27420
ICS 60	LEA-2	DAT30	27695
ICS 60	LEA-2	DAT30	27558
ICS 60	LEA-3	WW	33655
ICS 60	LEA-3	WW	33023
ICS 60	LEA-3	WW	33339
ICS 60	LEA-3	DAT19	31706
ICS 60	LEA-3	DAT19	32031
ICS 60	LEA-3	DAT19	31981
ICS 60	LEA-3	DAT30	29838
ICS 60	LEA-3	DAT30	30113
ICS 60	LEA-3	DAT30	29975
ICS 60	LEA-4	WW	29752
ICS 60	LEA-4	WW	29544
ICS 60	LEA-4	WW	29648
ICS 60	LEA-4	DAT19	34596
ICS 60	LEA-4	DAT19	34921
ICS 60	LEA-4	DAT19	34871
ICS 60	LEA-4	DAT30	27810
ICS 60	LEA-4	DAT30	28085
ICS 60	LEA-4	DAT30	27948
ICS 60	LEA-5	WW	31821
ICS 60	LEA-5	WW	32388
ICS 60	LEA-5	WW	32105
ICS 60	LEA-5	DAT19	33064
ICS 60	LEA-5	DAT19	33414
ICS 60	LEA-5	DAT19	33339
ICS 60	LEA-5	DAT30	28482
ICS 60	LEA-5	DAT30	28757
ICS 60	LEA-5	DAT30	28620
ICS 60	LEA-6	WW	31837
ICS 60	LEA-6	WW	30821
ICS 60	LEA-6	WW	31329
ICS 60	LEA-6	DAT19	35063
ICS 60	LEA-6	DAT19	35388
ICS 60	LEA-6	DAT19	35338
ICS 60	LEA-6	DAT30	31723
ICS 60	LEA-6	DAT30	31998
ICS 60	LEA-6	DAT30	31861
ICS 60	SMP	WW	29368
ICS 60	SMP	WW	29254
ICS 60	SMP	WW	29311
ICS 60	SMP	DAT19	32336
ICS 60	SMP	DAT19	32661
ICS 60	SMP	DAT19	32611
ICS 60	SMP	DAT30	25636
ICS 60	SMP	DAT30	25911
ICS 60	SMP	DAT30	25774
ICS 60	DHN	WW	33545
ICS 60	DHN	WW	33730
ICS 60	DHN	WW	33638
ICS 60	DHN	DAT19	34399
ICS 60	DHN	DAT19	34724
ICS 60	DHN	DAT19	34674
ICS 60	DHN	DAT30	35518
ICS 60	DHN	DAT30	35793
ICS 60	DHN	DAT30	35655
