# Supplementary material
Source: Research Square preprint supplement (doi:10.21203/rs.3.rs-8999141/v1)
Supplement: Supplementary file 6 [file b12b65805f14484c05368660.xlsx]

## Sheet: Sheet1
Genome-wide identification and characterization of the late embryogenesis abundant (LEA) protein-encoding gene family related to water deficit response in Theobroma cacao Velasco-Anacona Ginna Patricia 1,2*, Giraldo-Murcia Julian Alejandro1,3, Noriega-Ortega Jhon Eduar¹, Rojas-Cruz Alexis Felipe4 ¹Laboratorio de Ciencias Básicas, Servicio Nacional de Aprendizaje SENA, Centro de Formación Agroindu…
Online Resource 6 Structural features, conserved domains and predicted subcellular localization of LEA superfamily proteins.																		Pfam					BUSCO
Group	Subfamily	NCBI GeneID	Symbol	Description	Nomenclature	Accession	Per, ident	Acc. Len	pI	MW	Instability index	Aliphatic index	GRAVY	Ac. number	Ac. number	Ac. number	Domain	Start	End	WoLF PSORT	Plant-mPLoc	LOCALIZER	Localization	Score	Subcellular localization
LEA	1	18606060*	LOC18606060	uncharacterized LOC18606060	LEA–1_chr3–1A	XP_007039530.2	0.5821	127	9.66	14004.86	56.58	51.17	-1052	PF03760	IPR005513	PTHR33493	Late embryogenesis abundant (LEA) group 1; Family members are conserved along the entire	1	71	nucl: 7	Nucleus.	Nucleus	nucleus	1.0	Nucleus
LEA	1	18606060*	LOC18606060	uncharacterized LOC18606060	LEA–1_chr3–1B	XP_017972709.1			9.66	13876.73	56.95	51.17	-1033	PF03760	IPR005513	PTHR33493	Late embryogenesis abundant (LEA) group 1; Family members are conserved along the entire	1	70	nucl: 7	Nucleus.	Nucleus	nucleus	1.0	Nucleus
LEA	1	18599099	LOC18599099	18 kDa seed maturation protein	LEA–1_chr5–1	XP_007028983.2	0.5305	163	7.18	17403.15	19.06	51.60	-0.923	PF03760	IPR005513	PTHR33493	Late embryogenesis abundant (LEA) group 1	1	71	nucl: 5	Nucleus.		nucleus	1.0	Nucleus
LEA	1	18599100	LOC18599100	late embryogenesis abundant protein D-113	LEA–1_chr5–2	XP_007028984.2	66.77%	166	5.08	17698.80	26.26	29.64	-1302	PF03760	IPR005513	PTHR33493	Late embryogenesis abundant protein, LEA_1 subgroup	1	65	mito: 7	Nucleus.		nucleus	1.0	Nucleus
LEA	2	18614030	LOC18614030	protein YLS9	LEA–2_chr1–1	XP_017969819.1	0.5161	248	9.68	27325.27	36.58	86.73	-0.115	PF03168	IPR004864	PTHR31234	Late embryogenesis abundant protein, LEA_2 subgroup	116	207	cyto: 5	Chloroplast	Chloroplast	organelle membrane	0.83	Chloroplast
LEA	2	18614068	LOC18614068	late embryogenesis abundant protein Lea14-A	LEA–2_chr1–2	XP_017974219.1	0.6821	151	4.81	16437.95	19.38	110.40	-0.009	PF03168	IPR004864	PTHR31459	Late embryogenesis abundant protein, LEA_2 subgroup	44	140	cyto: 5.5	Cell membrane. Chloroplast. Golgi apparatus. Nucleus.		nucleus	1.0	Nucleus
LEA	2	18607375*	LOC18607375	uncharacterized LOC18607375	LEA–2_chr2–1A	XP_007041580.2	0.7619	258	9.08	27882.12	34.51	87.71	0.014	PF03168	IPR004864	PTHR31234	Late embryogenesis abundant protein	137	233	cyto: 5	Chloroplast.		endomembrane system	0.94	Chloroplast
LEA	2	18607375*	LOC18607375	uncharacterized LOC18607375	LEA–2_chr2–1B	XP_007041581.2			8.87	25292.1	34.75	84.23	-0.035	PF03168	IPR004864	PTHR31234	Late embryogenesis abundant protein	137	218	cyto: 4	Cell membrane. Chloroplast. Nucleus.		endomembrane system	0.91	Chloroplast
LEA	2	18606720*	LOC18606720	uncharacterized LOC18606720	LEA–2_chr3–1A	XP_017972180.1	0.5341	212	9.47	22799.32	27.56	83.16	0.290	PF03168	IPR004864	PTHR31852	Late embryogenesis abundant protein, LEA_2 subgroup	71	155	nucl: 6	Cell membrane		nucleus	0.63	Nucleus
LEA	2	18606720*	LOC18606720	uncharacterized LOC18606720	LEA–2_chr3–1B	XP_017972181.1			9.55	20547.46	33.89	67.21	-0.113	PF03168	IPR004864	PTHR31852	Late embryogenesis abundant protein, LEA_2 subgroup	49	133	nucl: 6	Cell membrane		nucleus	1.0	Nucleus
LEA	2	18602400	LOC18602400	uncharacterized protein LOC18602400	LEA–2_chr4–1	XP_007033816.2	0.5139	215	9.48	23526.44	36.68	103.81	0.194	PF03168	IPR004864	PTHR31234	Late embryogenesis abundant protein, LEA_2 subgroup	95	187	cyto: 4	Nucleus.	Nucleus	endomembrane system	0.9	Nucleus
LEA	2	18597391*	LOC18597391	desiccation-related protein At2g46140	LEA–2_chr5–1A	XP_007026466.1	0.7593	311	4.67	35785.81	19.20	95.88	-0.335	PF03168	IPR004864	PTHR31459	Late embryogenesis abundant protein, LEA_2 subgroup	71	166	cysk: 9	Nucleus		nucleus	1.0	Nucleus
LEA	2	18597391*	LOC18597391	desiccation-related protein At2g46140	LEA–2_chr5–1B	XP_007026467.1			4.69	34528.32	19.20	95.88	-0.335	PF03168	IPR004864	PTHR31459	Late embryogenesis abundant protein, LEA_2 subgroup	71	166	cysk: 9	Nucleus		nucleus	1.0	Nucleus
LEA	2	18597391*	LOC18597391	desiccation-related protein At2g46140	LEA–2_chr5–1C	XP_017976865.1			4.69	34528.32	19.20	95.88	-0.335	PF03168	IPR004864	PTHR31459	Late embryogenesis abundant protein, LEA_2 subgroup	71	166	cysk: 9	Nucleus		nucleus	1.0	Nucleus
LEA	2	18598383	LOC18598383	NDR1/HIN1-like protein 12	LEA–2_chr5–2	XP_017977655.1	0.5924	209	10.02	23604.68	38.13	100.72	0.174	PF03168	IPR004864	PTHR31415	Late embryogenesis abundant protein, LEA_2 subgroup	74	173	chlo: 4	Cell membrane. Chloroplast. Golgi apparatus.	Mitochondria	endomembrane system	0.9	Chloroplast
LEA	2	18599351	LOC18599351	Late embryogenesis abundant (LEA) hydroxyproline-rich glycoprotein family	LEA–2_chr5–3	XP_007029347.2	0.5605	248	9.75	27518.61	44.85	106.09	-0.043	PF03168	IPR004864	PTHR31234	Late embryogenesis abundant protein, LEA_2 subgroup	121	216	cyto: 5	Chloroplast.		organelle membrane	0.85	Chloroplast
LEA	2	18597085	LOC18597085	protein YLS9	LEA–2_chr6–1	XP_017978440.1	0.5534	230	9.69	26699.85	46.82	74.09	-0.357	PF03168	IPR004864	PTHR31415	Late embryogenesis abundant protein, LEA_2 subgroup	104	206	cyto: 7	Chloroplast. Mitochondrion. Nucleus.	Nucleus	organelle membrane	0.86	Chloroplast
LEA	2	18588615*	LOC18588615	Late embryogenesis abundant (LEA) hydroxyproline-rich glycoprotein family	LEA–2_chr9–1A	XP_017978081.1	0.5436	249	6.44	27943.35	42.60	98.92	0.107	PF03168	IPR004864	PTHR31234	Late embryogenesis abundant protein, LEA_2 subgroup	101	195	E.R.: 5	Chloroplast		nucleus	1.0	Chloroplast
LEA	2	18588615*	LOC18588615	Late embryogenesis abundant (LEA) hydroxyproline-rich glycoprotein family	LEA–2_chr9–1B	XP_017978082.1			6.3	26931.39	39.54	105.87	0.171	PF03168	IPR004864	PTHR31234	Late embryogenesis abundant protein, LEA_2 subgroup	101	195	plas: 5	Chloroplast		nucleus	1.0	Chloroplast
LEA	2	18588615*	LOC18588615	Late embryogenesis abundant (LEA) hydroxyproline-rich glycoprotein family	LEA–2_chr9–1C	XP_007024133.1			6.29	24842.88	39.89	100.86	0.105	PF03168	IPR004864	PTHR31234	Late embryogenesis abundant protein, LEA_2 subgroup	101	195	plas: 5	Chloroplast.		nucleus	1.0	Chloroplast
LEA	2	18590297	LOC18590297	uncharacterized LOC18590297	LEA–2_chr9–2	XP_007015786.1	0.7611	183	8.63	20035.26	30.86	101.80	0.107	PF03168	IPR004864	PTHR31234	Late embryogenesis abundant protein, LEA_2 subgroup	59	157	extr: 10	Cell membrane.		extracellular space	0.77	Cell membrane
LEA	2	18590846*	LOC18590846	NDR1/HIN1-Like protein 3	LEA–2_chr9–3A	XP_007016677.1	0.5192	260	9.1	28155.5	40.46	90.35	-0.108	PF03168	IPR004864	PTHR31234	Late embryogenesis abundant protein, LEA_2 subgroup	132	235	chlo: 6	Chloroplast		plasma membrane	0.76	Chloroplast
LEA	2	18590846*	LOC18590846	NDR1/HIN1-Like protein 3	LEA–2_chr9–3B	XP_017983971.1			9.1	28155.5	40.46	90.35	-0.108	PF03168	IPR004864	PTHR31234	Late embryogenesis abundant protein, LEA_2 subgroup	132	235	chlo: 6	Chloroplast		plasma membrane	0.76	Chloroplast
LEA	3	18613581	LOC18613581	Indole-3-acetic acid-induced protein ARG2	LEA–3_chr1–1	XP_007050958.2	0.5895	94	9.82	9960.38	36.52	76.91	-0.213	PF03242	IPR004926	PTHR33509	Late embryogenesis abundant protein, LEA_3a subgroup	1	93	cyto: 9	Nucleus	Mitochondria	mitochondrion	0.73	Mitochondria
LEA	3	18596305*	LOC18596305	protein SENESCENCE-ASSOCIATED GENE 21, mitochondrial	LEA–3_chr6–1A	XP_007024758.2	57.65%	85	9.45	9785.26	38.99	76.94	-0.513	PF03242	IPR004926	PTHR33509	Late embryogenesis abundant protein, LEA_3a subgroup	6	84	mito: 7	Cloroplast	Mitochondria	chloroplast inner membrane	0.7	Mitochondria
LEA	3	18596305*	LOC18596305	protein SENESCENCE-ASSOCIATED GENE 21, mitochondrial	LEA–3_chr6–1B	XP_017979280.1	53.85%	84	9.45	9698.18	39.34	77.86	-0.510	PF03242	IPR004926	PTHR33509	Late embryogenesis abundant protein, LEA_3a subgroup	9	83	mito: 6	Nucleus	Mitochondria	mitochondrion	0.69	Mitochondria
LEA	4	108661872	LOC108661872	embryonic protein DC-8-like	LEA–4_chr5–1	XP_017976228.1	76.05%	438	6.25	47842.57	28.64	37.12	-1326	PF02987	IPR004238	PTHR47877	Late embryogenesis abundant protein ECP63-like domain	220	260	nucl: 12	Cell wall.		nucleus	1.0	Nucleus
LEA	5	18597510	LOC18597510	protein SLE1	LEA–5_chr5–1	XP_007026648.2	0.5839	174	9.72	18997.39	40.68	60.06	-0.857	PF00477	IPR000389	PTHR34671	Late embryogenesis abundant protein, LEA_5 subgroup	66	172	chlo: 10	Nucleus		chloroplast	0.57	Nucleus
LEA	5	18585834	LOC18585834	em-like protein	LEA–5_chr10–1	XP_007008932.1	0.5802	99	6.62	10843.83	38.99	44.44	-1391	PF00477	IPR000389	PTHR34671	Late embryogenesis abundant protein, LEA_5 subgroup	9	62	nucl: 7	Nucleus	Nucleus	nucleus	1.0	Nucleus
LEA	5	18585833	LOC18585833	em-like protein GEA6	LEA–5_chr10–2	XP_007008931.2	0.6769	156	5.97	17088.79	46.47	58.14	-0.988	PF00477	IPR000389	PTHR34671	Late embryogenesis abundant protein, LEA_5 subgroup	64	118	nucl: 9.5	Nucleus.		nucleus	1.0	Nucleus
LEA	6	18607153	LOC18607153	similar to PvLEA18	LEA–6_chr2–1	XP_007041238.2	0.55	89	5.31	9505.37	59.27	57.08	-0.939	PF10714	IPR018930	-	Late embryogenesis abundant protein, LEA6	6	81	nucl: 10	Nucleus.		nucleus	1.0	Nucleus
SMP		18613320	LOC18613320	Late embryogenesis abundant protein D-34	SMP_chr1–1	XP_007050564.2	0.5255	284	5.05	29255.68	31.58	75.60	-0.296	PF04927	IPR007011	PTHR31174	Late embryogenesis abundant protein, SMP subgroup domain	20	72	chlo: 8	Nucleus	Nucleus	nucleus	1.0	Nucleus
SMP		18602997	LOC18602997	late embryogenesis abundant protein D-34	SMP_chr4–1	XP_017974681.1	0.5208	237	4.68	24609.25	38.48	84.09	-0.302	PF04927	IPR007011	PTHR31174	Seed maturation protein	20	72	cyto: 6	Nucleus		nucleus	1.0	Nucleus
SMP		18600259	LOC18600259	late embryogenesis abundant protein D-34	SMP_chr5–1	XP_007030655.2	0.5312	256	5.32	26489.57	42.12	73.40	-0.368	PF04927	IPR007011	PTHR31174	Seed maturation protein	20	72	nucl: 5.5	Nucleus		nucleus	1.0	Nucleus
DHD		18610856	LOC18610856	late embryogenesis abundant protein D-11	DHD_chr1–1	XP_017983363.1	78.84%	114	9.30	12349.45	38.41	34.30	-1419	PF00257	IPR000167	PTHR33346	Dehydrin	51	114	nucl: 12	Nucleus	Nucleus	nucleus	1.0	Nucleus
DHD		18607463	LOC18607463	phosphoprotein ECPP44	DHD_chr2–1	XP_017970635.1	0.5143	173	6.04	19442.49	30.18	41.27	-1735	PF00257	IPR000167	PTHR33346	Dehydrin	36	126	nucl: 13	Nucleus	Nucleus	nucleus	1.0	Nucleus
DHD		18607734	LOC18607734	late embryogenesis abundant protein	DHD_chr2–2	XP_007042106.2	0.5	169	6.63	18425.14	42.28	44.97	-1220	PF00257	IPR000167	PTHR33346	Dehydrin	22	167	nucl: 9	Cytoplasm	Nucleus	extracellular space	0.64	Nucleus
DHD		18599816	LOC18599816	Protein SRC1	DHD_chr5–1	XP_007030020.1	0.5077	98	6.67	10809.82	43.08	21.94	-1905	-	IPR039285	PTHR34941	Dehydrin HIRD11-like	1	98	nucl: 13	Nucleus	Nucleus	nucleus	1.0	Nucleus
DHD		18591660	LOC18591660	Dehydrin COR 47	DHD_chr8–1	XP_007017965.2	0.5	234	5.41	26410.6	61.32	49.62	-1487	PF00257	IPR000167	PTHR33346	Dehydrin	60	171	nucl: 13	Nucleus	Nucleus	nucleus	1.0	Nucleus
